# Supplementary material for: Comparative Analysis of Canopy Cooling in Wheat under High Temperature and Drought Stress
Source: MDPI journal article supplement (doi:10.3390/agronomy12040978), 2022-04-18
Supplement: s1 [file s1]

Archive with 4 entries (4 files):
- Supplementary .pdf
- Table S1. (ANN, 03.22.2022).xlsx
- Table S2. HSI (ANN, 03.22.2022).xlsx
- Table S3. DSI (ANN, 03.22.2022).xlsx
