# Supplementary material for: Comparative Analysis of Canopy Cooling in Wheat under High Temperature and Drought Stress
Source: MDPI journal article supplement (doi:10.3390/agronomy12040978), 2022-04-18
Supplement: s1 [file s1 › Supplementary .pdf]

## Supplementary

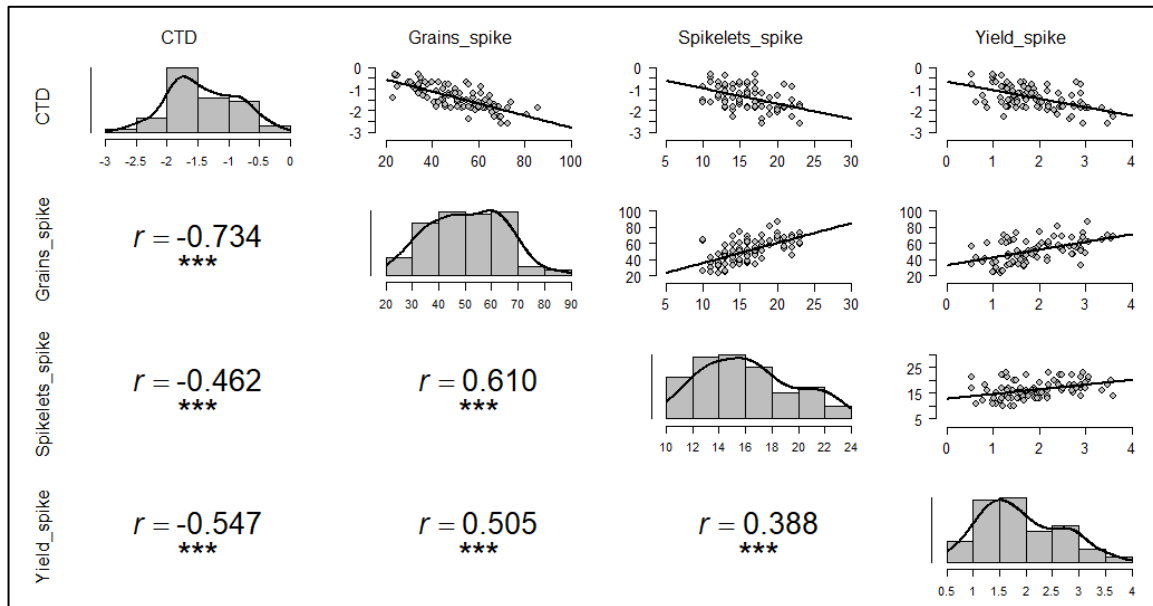

**Figure S1. Influence of canopy temperature depression (CTD) on grain yield components under drought condition.** Pearson correlation coefficient revealed by  $r$  value and each graph consists of 135 pairs of data points generated from experiment over two years, for treatment **drought** alone and 15 genotypes. **Where**, \*\*\*, \*\* and \* depicts significant differences at P value of 0.001, 0.01, 0.05, respectively.

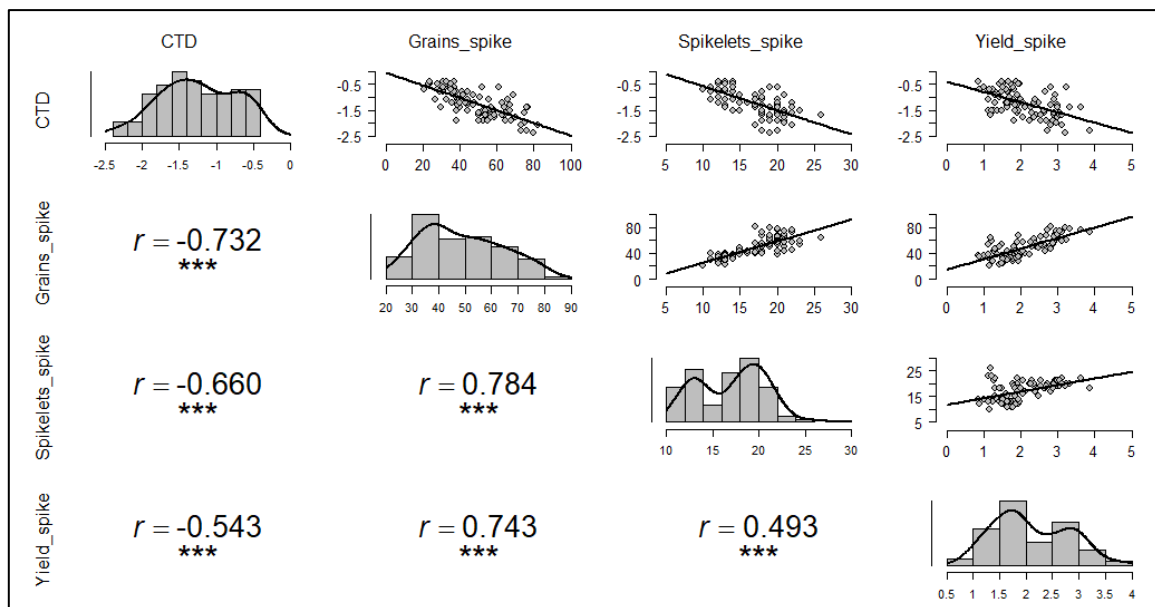

**Figure S2. Influence of canopy temperature depression (CTD) on grain yield components under late sown condition.** Pearson correlation coefficient revealed by  $r$  value and each graph consists of 135 pairs of data point generated from experiment over two years, for treatment **late sown** alone and 15 genotypes. **Where**, \*\*\*, \*\* and \* depicts significant differences at P value of 0.001, 0.01, 0.05, respectively.

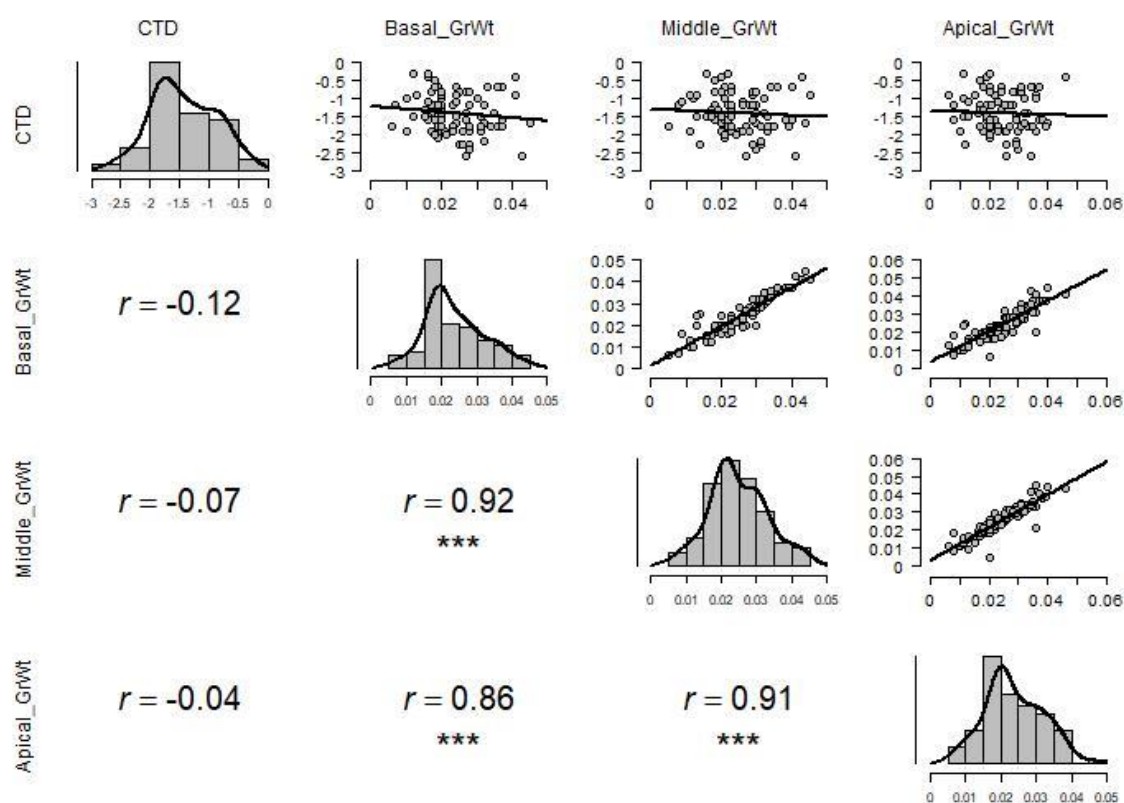

**Figure S3. Influence of canopy temperature depression (CTD) on grain weight at apical, middle and basal parts of spike.** Pearson correlation coefficient revealed by  $r$  value and each graph consists of 135 pairs of data point generated from experiment over two years, for treatment **drought** alone and 15 genotypes. **Where**, \*\*\*, \*\* and \* depicts significant differences at P value of 0.001, 0.01, 0.05, respectively.

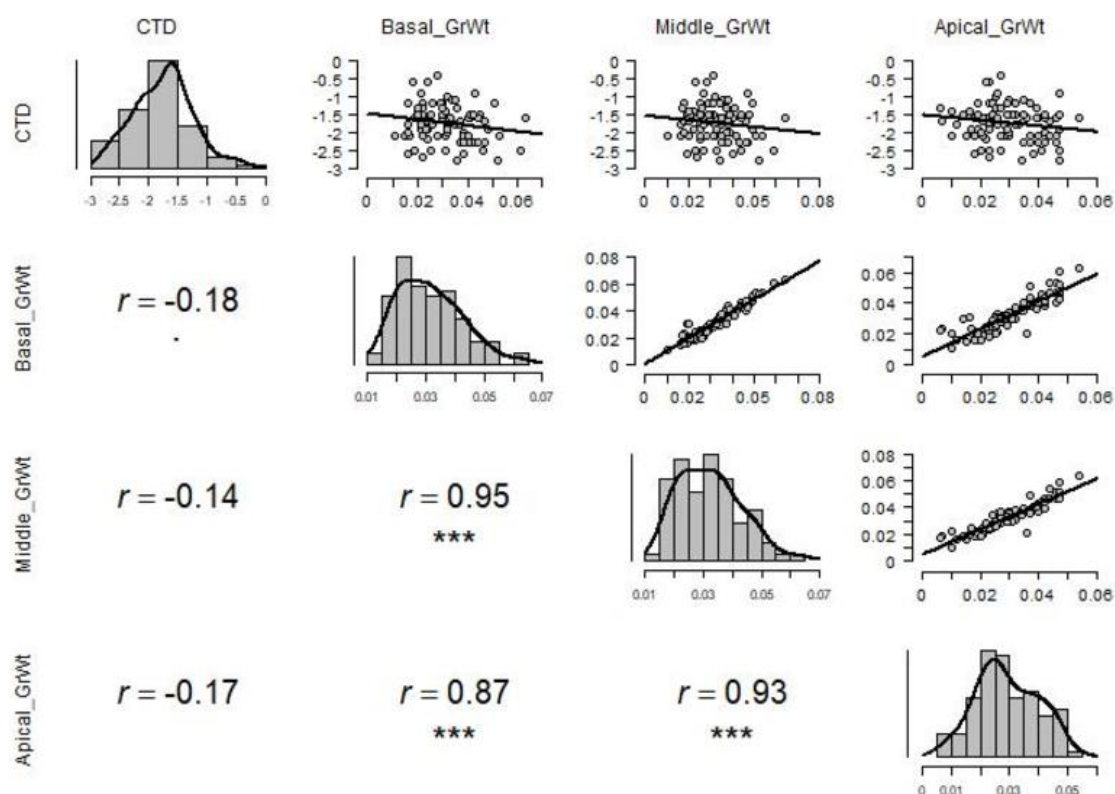

**Figure S4. Influence of canopy temperature depression (CTD) on grain weight at apical, middle and basal parts of spike under non-stressed condition.** Pearson correlation coefficient revealed by  $r$  value and each graph consists of 135 pairs of data point generated from experiment over two years, for non-stressed treatment alone and 15 genotypes. **Where**, \*\*\*, \*\* and \* depicts significant differences at P value of 0.001, 0.01, 0.05, respectively.

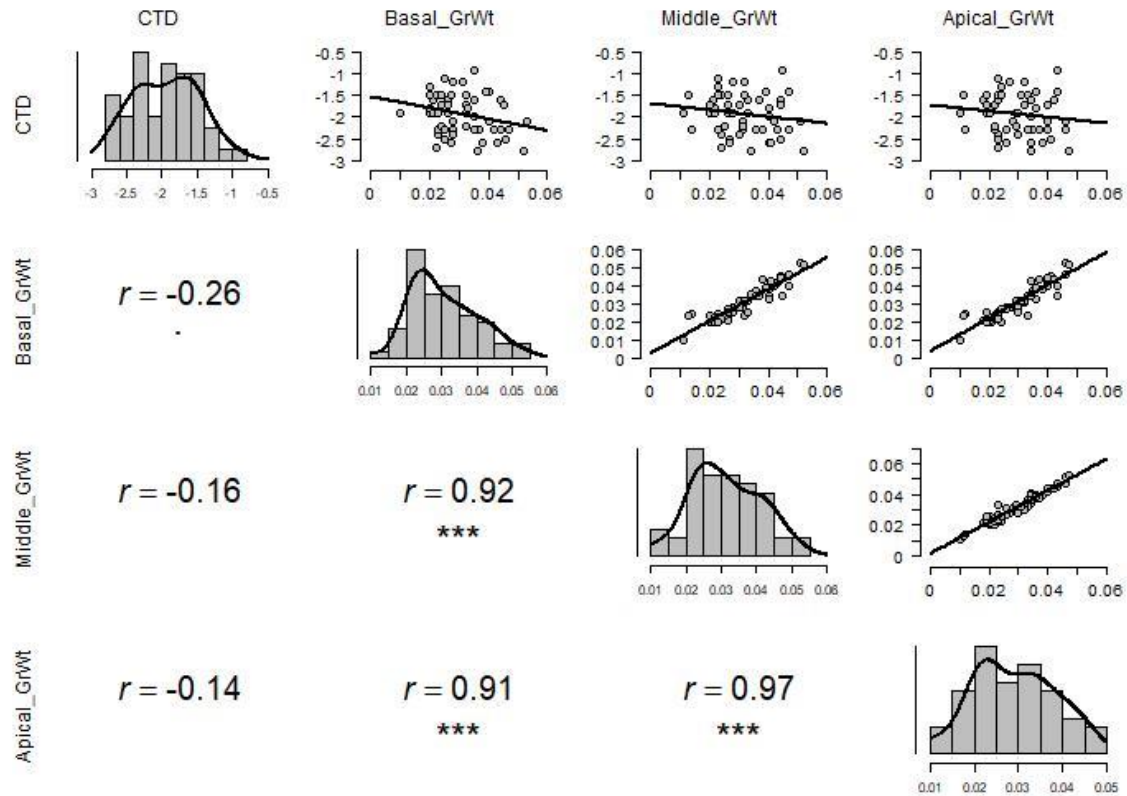

**Figure S5. Influence of canopy temperature depression (CTD) on grain weight at apical, middle and basal parts of spike for compact shaped spikes.** Pearson correlation coefficient revealed by  $r$  value and each graph consists of 135 pairs of data point generated from experiment over two years. **Where,** \*\*\*, \*\* and \* depicts significant differences at P value of 0.001, 0.01, 0.05, respectively.

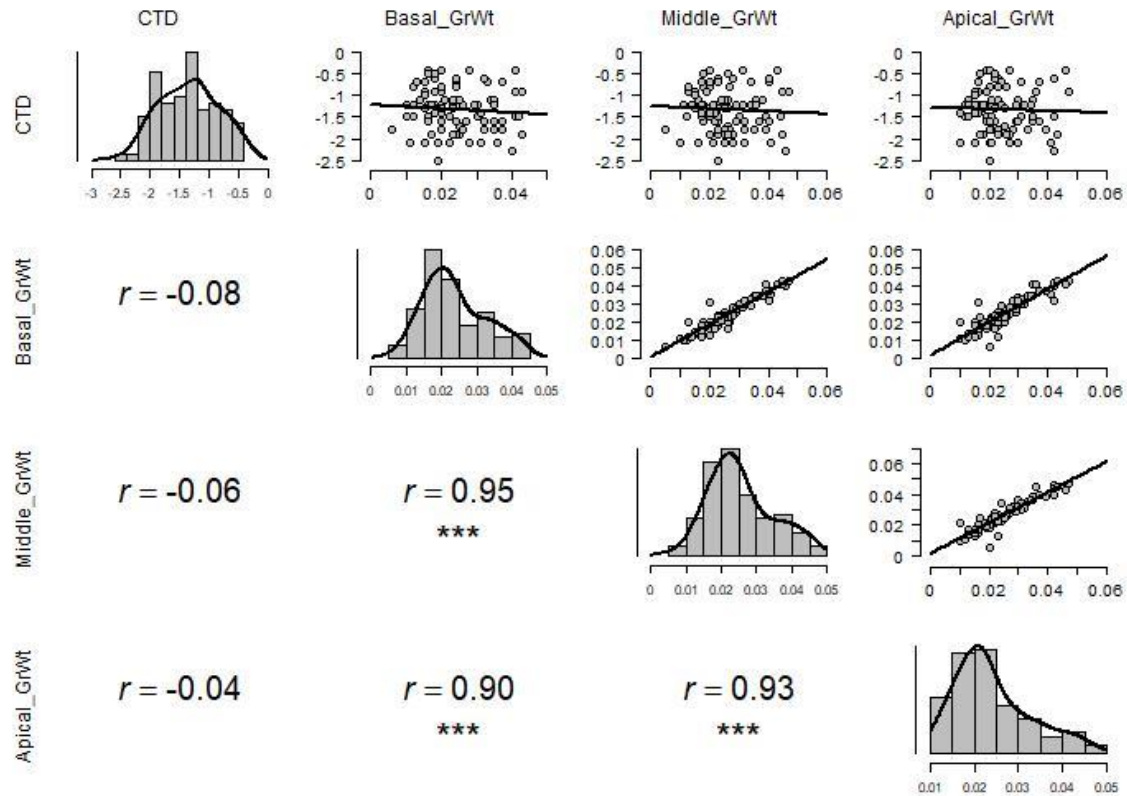

**Figure S6. Influence of canopy temperature depression (CTD) on grain weight at apical, middle and basal parts of spike for speltoid shaped spikes.** Pearson correlation coefficient revealed by  $r$  value and each graph consists of 135 pairs of data point generated from experiment over two years. **Where,** \*\*\*, \*\* and \* depicts significant differences at P value of 0.001, 0.01, 0.05, respectively.
