# Supplementary material for: Comparative Analysis of Canopy Cooling in Wheat under High Temperature and Drought Stress
Source: MDPI journal article supplement (doi:10.3390/agronomy12040978), 2022-04-18
Supplement: s1 [file s1 › Table S1. (ANN, 03.22.2022).xlsx]

## Sheet: Table S1
Table S1. Post hoc test of the various yield-related traits of 15 wheat genotypes under the non-stressed (control), drought and high temperature (late sown) condition averaged for 2017-2018 and 2018-2019 growing seasons.
Treatment:Genotype	CTD(⁰C)		Grains spikeˉ¹		Spikeletsspikeˉ¹		Grain yieldspikeˉ¹(g)		GFD
Control:AKAW4627	-2.48333	s	77.3333	a	20.6667	bcdefg	3.68656	a	36.5	abcde
Control:Halna	-1.56667	hijklmnop	56.1667	efghijk	17.6667	jklmn	2.69333	bcdefgh	30.6667	klmn
Control:HD2643	-2.01667	pqr	57.1667	efghij	20.5	bcdefg	3.18744	abc	35.8333	abcdef
Control:HD2967	-1.85	mnopq	62.1667	cdefg	21.6667	abc	2.97667	bcd	33.3333	efghijk
Control:HD2987	-1.96667	opq	56.6667	efghij	20	cdefgh	3.34816	ab	37.1667	abc
Control:HPBW01	-1.95	nopq	62.7667	cdef	19	ghijk	2.37549	defghijk	36.5	abcde
Control:HUW234	-1.86667	nopq	61.6429	cdefgh	20.1667	bcdefgh	3.11293	abc	37.6667	ab
Control:MP4010	-1.01667	abcde	39	opqrst	15.8333	opq	1.78406	jklmnop	30.6667	klmn
Control:PBW175	-1.48333	efghijklmno	45.1667	lmnop	17.8333	jklmn	2.524	cdefghi	36	abcdef
Control:PBW396	-1.46667	efghijklmn	47.4722	jklmno	16.3333	mnop	2.08258	fghijklmn	38.3333	a
Control:Raj3765	-1.71667	jklmnopq	55.5	efghijk	19.3333	fghij	2.52889	cdefghi	38.3333	a
Control:Raj4037	-1.7	jklmnopq	46.0909	klmnop	17.3333	klmno	2.08918	fghijklmn	36.6667	abcd
Control:Raj4079	-1.3	defghijk	37.1667	pqrst	13.8333	rst	1.73201	klmnop	34.6667	bcdefghi
Control:Sunstar	-2.41667	rs	77	a	21.8333	ab	2.45898	cdefghijk	35.6667	abcdefg
Control:WH730	-1.46667	efghijklmn	52.1667	ghijklm	21.5	abcd	1.52651	lmnop	35	bcdefgh
Drought:AKAW4627	-2.08333	qrs	70.3611	abc	21	bcdef	2.7	bcdefgh	36	abcdef
Drought:Halna	-1.03333	abcdef	48.7778	ijklmno	15.6667	opq	1.62667	lmnop	32.8333	fghijk
Drought:HD2643	-1.18333	cdefghi	44.4121	lmnop	17	lmno	2.0055	hijklmno	32.3333	hijkl
Drought:HD2967	-1.8	lmnopq	60.1667	defgh	19.3333	fghij	3.03227	abcd	31.5	ijkl
Drought:HD2987	-1.9	nopq	65.5	bcde	18.6667	hijkl	1.82024	ijklmnop	34.3333	cdefghi
Drought:HPBW01	-1.46667	efghijklmn	57.6315	efghij	16.6667	mno	2.15833	fghijklm	34.6667	bcdefghi
Drought:HUW234	-1.93333	nopq	58.0704	defghi	15.8333	opq	3.00248	abcd	34.6667	bcdefghi
Drought:MP4010	-0.6	a	29.0833	tu	11.6667	u	1.085	p	28.1667	mn
Drought:PBW175	-0.816667	abc	34.3333	qrstu	14.5	qrs	1.33201	op	34.5	bcdefghi
Drought:PBW396	-1.51667	ghijklmno	42.5	mnopq	13.5	rst	1.59643	lmnop	35.6667	abcdefg
Drought:Raj3765	-1.36667	defghijklm	46.3333	klmnop	13.3333	rstu	1.79949	ijklmnop	33.5	defghijk
Drought:Raj4037	-0.9	abcd	29.6667	stu	12.1667	tu	1.41194	nop	35.8333	abcdef
Drought:Raj4079	-1.36667	defghijklm	57.8333	efghi	16.1667	nopq	1.07807	p	34.6667	bcdefghi
Drought:Sunstar	-1.71667	jklmnopq	60.3333	cdefgh	21.3333	abcde	1.813	ijklmnop	33.6667	defghijk
Drought:WH730	-1.63333	ijklmnopq	55.3889	efghijk	15.8333	opq	2.03611	ghijklmno	31	jklm
Late sown:AKAW4627	-1.76667	klmnopq	74.6667	ab	19.6667	efghi	3.1725	abc	30.8333	jklmn
Late sown:Halna	-1.31667	defghijkl	49.6333	ijklmn	17.8333	jklmn	2.2355	efghijkl	31.5	ijkl
Late sown:HD2643	-1.08333	bcdefg	42.5061	mnopq	18.5	hijkl	1.79571	ijklmnop	32.5	ghijk
Late sown:HD2967	-1.71667	jklmnopq	60.5	cdefgh	19.8333	defgh	2.5229	cdefghi	31.5	ijkl
Late sown:HD2987	-0.616667	a	31.0694	rstu	12.8333	stu	1.50806	lmnop	34	cdefghij
Late sown:HPBW01	-1.71667	jklmnopq	60.1667	defgh	19.3333	fghij	2.75732	bcdefg	32.5	ghijk
Late sown:HUW234	-1.66667	jklmnopq	68.1667	abcd	20.5	bcdefg	2.89864	bcde	33.1667	fghijk
Late sown:MP4010	-0.916667	abcd	36.1667	pqrst	12.1667	tu	1.62889	lmnop	27.8333	n
Late sown:PBW175	-0.6	a	26.3333	u	12.1667	tu	1.45516	mnop	32	hijkl
Late sown:PBW396	-1.1	bcdefgh	39.2143	opqrs	14.5	qrs	1.42214	mnop	35	bcdefgh
Late sown:Raj3765	-1.65	ijklmnopq	51.5992	hijklm	18	ijklm	2.50666	cdefghij	31.8333	hijkl
Late sown:Raj4037	-0.7	ab	33.9722	qrstu	12.8333	stu	1.84738	ijklmno	34.8333	bcdefgh
Late sown:Raj4079	-1.03333	abcdef	40.3333	nopqr	14.6667	pqr	1.63222	lmnop	33.8333	defghijk
Late sown:Sunstar	-1.5	fghijklmno	53.711	fghijkl	22.8333	a	1.33546	op	31	jklm
Late sown:WH730	-1.25	cdefghij	61	cdefgh	19.8333	defgh	2.76944	bcdef	29.1667	lmn
