# Supplementary material for: Comparative Analysis of Canopy Cooling in Wheat under High Temperature and Drought Stress
Source: MDPI journal article supplement (doi:10.3390/agronomy12040978), 2022-04-18
Supplement: s1 [file s1 › Table S2. HSI (ANN, 03.22.2022).xlsx]

## Sheet: Table S2. HSI
Table S2. Heat susceptibility index (HSI) of all the parameters for fifteen wheat genotypes under late sown treatment for 2017-2018 and 2018-2019.
	S. No.	Genotype	Grains_spike	Spikelets_spike	Yield_spike (g)	Grain-fill duration	Basal grain wt. (g)	Middle grain wt. (g)	Apical grain wt. (g)	Spike_length (cm)	CTD (⁰C)
	1	AKAW 4627	0.275202	0.489919	0.802813	1.60677	1.37714	1.18998	1.48298	0.816129	0.993054
	2	Halna	0.928339	-0.0955189	0.978675	-0.281237	-0.587802	-0.0281724	0.104025	0.288098	0.549103
	3	HD 2643	2.04672	0.987805	2.51382	0.962746	1.12794	1.28215	1.13425	0.529622	1.59255
	4	HD 2967	0.213964	0.856731	0.877647	0.569223	-1.71377	-2.41043	-3.1381	0.257946	0.248003
	5	HD 2987	3.60508	3.62812	3.16415	0.881797	2.85393	3.15112	3.72649	1.2451	2.36208
	6	HPBW 01	0.330594	-0.177632	-0.925391	1.13419	0.129308	0.171244	-0.604374	0.520852	0.411749
	7	HUW 234	-0.844634	-0.167355	0.396329	1.23645	0	-0.352958	-0.463582	0.203352	0.368684
	8	MP 4010	0.579807	2.34474	0.500761	0.956205	1.62887	1.62623	1.23408	0.663335	0.338464
	9	PBW 175	3.32782	3.21729	2.43806	1.14995	1.55849	1.94077	1.56905	1.43169	2.04916
	10	PBW 396	1.3883	1.13648	1.8258	0.899958	1.65849	2.00817	2.31228	2.55466	0.860262
	11	Raj 3765	0.560932	0.698276	0.0506163	1.75492	1.64831	1.88157	2.73826	0.521824	0.133633
	12	Raj 4037	2.09841	2.62861	0.666351	0.517476	-0.0543249	-0.202655	-0.362786	2.30105	2.02415
	13	Raj 4079	-0.679984	-0.60994	0.331714	0.248786	2.32465	2.14217	2.51902	1.4807	0.705856
	14	Sunstar	2.41385	-0.46374	2.63057	1.35414	0.89135	0.723629	1.06212	1.54474	1.30523
	15	WH 730	-1.35139	0.784884	-4.68782	1.72492	-0.246346	-0.578215	-2.53351	0.540808	0.508337
