# Supplementary material for: Comparative Analysis of Canopy Cooling in Wheat under High Temperature and Drought Stress
Source: MDPI journal article supplement (doi:10.3390/agronomy12040978), 2022-04-18
Supplement: s1 [file s1 › Table S3. DSI (ANN, 03.22.2022).xlsx]

## Sheet: Table S3. DSI
Table S3. Drought susceptibility index (DSI) of all the parameters for fifteen wheat genotypes under terminal drought treatment for 2017-2018 and 2018-2019.
	S. No.	Genotype	Grains_spike	Spikelets_spike	Yield_spike (g)	Grain-fill duration	Basal grain wt. (g)	Middle grain wt. (g)	Apical grain wt. (g)	Spike_length (cm)	CTD (⁰C)
	1	AKAW 4627	1.02823	-0.111982	1.06124	0.246114	1.10203	1.11983	1.3903	1.72358	0.854722
	2	Halna	1.50033	0.785984	1.57055	-1.26936	0.0748766	0.543076	0.704687	-1.36898	1.80643
	3	HD 2643	2.54454	1.18537	1.4705	1.75485	0.49119	0.724185	0.384182	2.03473	2.19273
	4	HD 2967	0.36691	0.747692	-0.0740805	0.988146	0.81865	0.439183	0.569412	0.102142	0.143416
	5	HD 2987	-1.77781	0.462857	1.8097	1.36963	2.2459	2.16624	2.51194	0.724461	0.179878
	6	HPBW 01	0.933071	0.852632	0.362528	0.902416	0.144129	0.315753	0.1181	1.90664	1.31526
	7	HUW 234	0.66096	1.49185	0.140707	1.43094	0.704215	0.750935	0.754903	-1.35619	-0.189514
	8	MP 4010	2.89994	1.82707	1.55388	1.46464	0.286088	0.432693	0.149284	-3.87307	2.17475
	9	PBW 175	2.73547	1.29773	1.87281	0.748596	1.13701	0.677752	-0.603922	2.02581	2.3849
	10	PBW 396	1.19453	1.20437	0.925733	1.24983	0.422529	0.262984	0.244747	3.54451	-0.1809
	11	Raj 3765	1.88367	2.15468	1.1438	2.26532	1.58041	1.76351	2.03142	3.14405	1.08189
	12	Raj 4037	4.06404	2.06951	1.28552	0.408325	1.33212	1.06763	1.72031	1.13233	2.49713
	13	Raj 4079	-6.34168	-1.17108	1.49729	0	1.52185	1.57443	1.1569	4.97615	-0.272123
	14	Sunstar	2.46857	0.158997	1.04178	1.00746	1.53	1.98678	2.39835	-0.710348	1.53703
	15	WH 730	-0.704449	1.8299	-1.32387	2.05329	-0.032146	-0.514904	-1.85277	-0.0295379	-0.603
